# Supplementary material for: Trabecular bone patterning in the hominoid distal femur
Source: PeerJ. 2018 Jul 5;6:e5156. doi: 10.7717/peerj.5156 (PMC6035864; doi:10.7717/peerj.5156)
Supplement: Supplemental Information 8 [file peerj-06-5156-s008.xlsx]

## Sheet: Sheet1
Specimen_ID	Taxon	Tb_N_Lateral anteroinferior	Tb_N_Lateral posteroinferior	Tb_N_Lateral posterosuperior	Tb_N_Medial anteroinferior	Tb_N_Medial posteroinferior	Tb_N_Medial posterosuperior	Tb_Sp_Lateral anteroinferior	Tb_Sp_Lateral posteroinferior	Tb_Sp_Lateral posterosuperior	Tb_Sp_Medial anteroinferior	Tb_Sp_Medial posteroinferior	Tb_Sp_Medial posterosuperior	Tb_Th_Lateral anteroinferior	Tb_Th_Lateral posteroinferior	Tb_Th_Lateral posterosuperior	Tb_Th_Medial anteroinferior	Tb_Th_Medial posteroinferior	Tb_Th_Medial posterosuperior	BVTV_Lateral anteroinferior	BVTV_Lateral posteroinferior	BVTV_Lateral posterosuperior	BVTV_Medial anteroinferior	BVTV_Medial posteroinferior	BVTV_Medial posterosuperior	DA_Lateral anteroinferior	DA_Lateral posteroinferior	DA_Lateral posterosuperior	DA_Medial anteroinferior	DA_Medial posteroinferior	DA_Medial posterosuperior
MPITC 11781	Pan troglodytes verus	0.971838	1.13629	1.14555	0.886303	1.07289	1.07201	0.75067	0.607096	0.628962	0.852967	0.681156	0.687138	0.278308	0.272963	0.243982	0.275315	0.250906	0.245691	0.279705	0.349561	0.305436	0.243275	0.290426	0.273761	0.316021	0.417388	0.370976	0.440317	0.491661	0.476723
MPITC 15001	Pan troglodytes verus	1.02033	1.10835	1.12103	0.977582	1.09018	1.07952	0.723822	0.64437	0.633661	0.773714	0.669251	0.66979	0.256253	0.257873	0.258373	0.249217	0.248027	0.256552	0.287992	0.327158	0.332904	0.262071	0.303297	0.309773	0.36277	0.386156	0.360031	0.468869	0.475038	0.451872
MPITC 15014	Pan troglodytes verus	1.26744	1.29903	1.26113	1.12377	1.31693	1.28005	0.557701	0.520245	0.552241	0.668528	0.541857	0.559501	0.231292	0.249558	0.240697	0.22133	0.217487	0.221718	0.303798	0.34751	0.329474	0.237059	0.302381	0.296617	0.250737	0.298882	0.320739	0.271751	0.318361	0.365828
MPITC 15026	Pan troglodytes verus	1.10981	1.20142	1.24772	1.01704	1.19576	1.12537	0.656759	0.569448	0.53642	0.747491	0.603346	0.632957	0.244297	0.262897	0.265039	0.235753	0.232942	0.25564	0.289844	0.343711	0.358683	0.242779	0.299075	0.302172	0.290577	0.329287	0.278191	0.380055	0.413026	0.39631
MPITC 15002	Pan troglodytes verus	1.17022	1.24079	1.21587	1.11744	1.24925	1.20231	0.623019	0.549191	0.581095	0.645823	0.535055	0.586337	0.231518	0.256744	0.241364	0.249078	0.265428	0.245396	0.287084	0.370138	0.328636	0.299585	0.38886	0.324888	0.261896	0.321968	0.296948	0.372233	0.41303	0.378677
MPITC 11786	Pan troglodytes verus	1.19106	1.25492	1.16921	1.11118	1.20576	1.17699	0.578382	0.528983	0.593477	0.648858	0.587249	0.592175	0.261204	0.267879	0.261802	0.25109	0.242107	0.25745	0.358855	0.395044	0.353933	0.298611	0.325824	0.339009	0.336111	0.405563	0.3165	0.439483	0.510969	0.476936
MPITC 11793	Pan troglodytes verus	0.92853	0.994448	1.00713	0.916829	1.08186	1.07383	0.752195	0.684321	0.690642	0.811414	0.661364	0.667157	0.324776	0.321262	0.302277	0.279303	0.262974	0.264086	0.337993	0.382519	0.368147	0.279683	0.326816	0.33094	0.340277	0.391145	0.349558	0.393119	0.469492	0.46587
MPITC 11778	Pan troglodytes verus	1.38046	1.39641	1.27469	1.26376	1.42908	1.30879	0.531799	0.512118	0.559743	0.571592	0.482521	0.547059	0.192599	0.204001	0.224764	0.219694	0.217232	0.217003	0.259115	0.300501	0.325525	0.292858	0.34662	0.314524	0.27751	0.320238	0.284595	0.319175	0.370298	0.387269
MPITC 13434	Pan troglodytes verus	1.2308	1.34027	1.33787	1.21316	1.35255	1.32323	0.584659	0.525343	0.519584	0.612159	0.532083	0.538941	0.227818	0.220773	0.227875	0.212136	0.207259	0.216787	0.265147	0.315343	0.333195	0.244654	0.293107	0.297095	0.349919	0.382483	0.328748	0.384875	0.417173	0.428386
MPITC 14996	Pan troglodytes verus	1.08534	1.2698	1.17104	1.05449	1.2212	1.17832	0.693494	0.566089	0.617952	0.703122	0.59222	0.611039	0.227876	0.221436	0.235991	0.245202	0.226643	0.23763	0.226558	0.295604	0.299891	0.26075	0.286184	0.294884	0.341278	0.398195	0.341476	0.421767	0.463392	0.421338
ZSM 1909 0801	Pongo pygmaeus	1.14509	1.25598	1.13954	1.00752	1.17151	1.04636	0.653908	0.57094	0.637721	0.756589	0.615275	0.67778	0.219385	0.225249	0.239827	0.235949	0.238326	0.27791	0.265201	0.30059	0.285758	0.237557	0.300725	0.318404	0.318069	0.319691	0.28768	0.36584	0.353624	0.348773
ZSM 1907 0660	Pongo pygmaeus	1.13534	1.32223	1.11004	1.03587	1.24581	1.12526	0.68607	0.553694	0.657867	0.770359	0.603374	0.674023	0.19472	0.202602	0.243001	0.195015	0.199317	0.214662	0.223079	0.271718	0.270069	0.187566	0.253262	0.24304	0.333286	0.352463	0.313545	0.353265	0.396689	0.398457
ZSM 1973 0270	Pongo abelii	0.990249	1.10059	0.978118	0.888969	1.00971	0.975044	0.784203	0.68657	0.780487	0.912449	0.801683	0.799378	0.225644	0.222036	0.241885	0.21245	0.188705	0.226217	0.228587	0.255466	0.246655	0.193346	0.185715	0.222587	0.302826	0.362861	0.34619	0.373284	0.399547	0.351979
ZSM 1966 0203	Pongo pygmaeus	0.91524	0.969319	0.893259	0.904413	0.943865	0.877958	0.782692	0.72104	0.789917	0.823726	0.753811	0.820922	0.309918	0.310612	0.32958	0.281963	0.305663	0.318085	0.311783	0.343981	0.325633	0.267547	0.327645	0.308718	0.383868	0.40898	0.397466	0.420597	0.442394	0.411587
ZSM 1907 0483	Pongo pygmaeus	1.08675	1.19574	1.09896	0.952552	1.05739	0.971156	0.700731	0.612789	0.669617	0.816109	0.717666	0.783529	0.219441	0.223513	0.240335	0.233703	0.228059	0.246172	0.25287	0.283424	0.281722	0.233607	0.25452	0.254179	0.370641	0.386053	0.290467	0.377181	0.389795	0.371475
ZSM 1907 0633B	Pongo pygmaeus	1.13658	1.19524	1.13947	1.01454	1.08708	1.00607	0.657953	0.586647	0.618016	0.757893	0.683489	0.728179	0.221878	0.250004	0.259584	0.227773	0.236404	0.265791	0.284738	0.351092	0.343136	0.25094	0.29586	0.307753	0.317319	0.393712	0.346441	0.404436	0.476276	0.433019
ZSM 1982 0092	Pongo sp	1.08474	1.13321	1.01543	1.01504	1.08161	1.03067	0.641421	0.563039	0.643988	0.715195	0.62422	0.640252	0.280462	0.319408	0.340821	0.269984	0.300325	0.329994	0.305841	0.416472	0.406926	0.263152	0.367307	0.392794	0.20646	0.259689	0.24548	0.221624	0.293396	0.251644
CAMPUS 66	Homo sapiens	0.801293	0.948359	0.765238	0.67144	0.89547	0.718599	0.916332	0.73673	0.962286	1.16248	0.83422	1.05822	0.331651	0.317723	0.344496	0.32686	0.282512	0.333372	0.253265	0.314655	0.260656	0.21554	0.276022	0.239201	0.386105	0.465184	0.414598	0.347729	0.533096	0.438719
CAMPUS 36	Homo sapiens	1.01381	1.29393	1.03351	0.917161	1.19293	1.06751	0.686604	0.534844	0.699606	0.82744	0.608164	0.683888	0.299772	0.237993	0.267972	0.26288	0.230107	0.252868	0.290973	0.313723	0.26796	0.244732	0.292418	0.260671	0.361631	0.416454	0.366965	0.371501	0.443358	0.408274
CAMPUS 72	Homo sapiens	0.8182	0.958944	0.744361	0.752311	0.910687	0.806403	0.914119	0.756921	1.04443	1.03467	0.822766	0.951083	0.308076	0.285893	0.299002	0.294572	0.275306	0.288992	0.251492	0.272865	0.207175	0.21264	0.249081	0.212179	0.378901	0.436374	0.403372	0.358542	0.467342	0.42949
CAMPUS 93	Homo sapiens	1.04179	1.21641	1.07045	0.926021	1.12278	1.0242	0.683941	0.584044	0.673212	0.825374	0.653646	0.727404	0.275944	0.23805	0.260972	0.254516	0.237003	0.248971	0.320432	0.305654	0.277572	0.247972	0.281436	0.250487	0.376038	0.431476	0.383828	0.397339	0.460294	0.401545
CAMPUS 8	Homo sapiens	1.00696	1.14706	0.97074	0.849737	1.06256	0.900592	0.667803	0.59968	0.714154	0.87562	0.677537	0.784519	0.325283	0.272115	0.315987	0.301215	0.263583	0.325862	0.348928	0.31953	0.314914	0.265769	0.300413	0.299902	0.359178	0.458901	0.439496	0.367639	0.48568	0.439433
CAMPUS 74	Homo sapiens	0.847324	1.12163	0.894228	0.835278	1.07138	0.867962	0.840643	0.592347	0.803712	0.845763	0.642054	0.855099	0.339543	0.299209	0.314571	0.351443	0.29132	0.297026	0.345354	0.368818	0.271576	0.322727	0.350262	0.266977	0.367131	0.439103	0.387368	0.347796	0.462395	0.416634
CAMPUS 82	Homo sapiens	0.962473	1.19184	1.02425	0.918	1.16244	1.02926	0.794737	0.628761	0.741458	0.80156	0.60193	0.709894	0.244254	0.210279	0.234868	0.287765	0.258327	0.261679	0.22808	0.234985	0.214558	0.297519	0.335879	0.268271	0.361902	0.434562	0.401527	0.430709	0.499832	0.46325
CAMPUS 86	Homo sapiens	0.950275	1.08353	0.894281	0.813862	1.04371	0.883138	0.746769	0.637588	0.792349	0.90514	0.694249	0.793875	0.305558	0.285323	0.325868	0.323569	0.263872	0.338451	0.261845	0.306565	0.272999	0.251824	0.284661	0.278564	0.359947	0.446247	0.429111	0.360063	0.472842	0.429535
CAMPUS 81	Homo sapiens	0.859424	1.09953	0.86269	0.778783	0.963856	0.787598	0.822614	0.631912	0.833568	0.998168	0.762481	0.959823	0.340957	0.277569	0.325597	0.285887	0.275018	0.30986	0.297552	0.303514	0.272245	0.229138	0.301889	0.245529	0.399225	0.4979	0.442353	0.339169	0.481546	0.421504
INDEN 371	Homo sapiens	0.993278	1.14516	1.0106	0.863073	1.07882	0.969165	0.702862	0.58973	0.694283	0.841316	0.632306	0.719909	0.303906	0.28351	0.295224	0.317336	0.294628	0.311907	0.308071	0.326858	0.291647	0.30703	0.3522	0.31631	0.368042	0.442914	0.408217	0.347935	0.406534	0.397029
M 95	Gorilla gorilla gorilla	0.831249	0.982657	0.896224	0.782502	0.927626	0.842333	0.897511	0.724238	0.823616	0.998069	0.795634	0.878476	0.305498	0.293411	0.292177	0.279883	0.282387	0.308703	0.268285	0.306121	0.267282	0.221885	0.274221	0.26787	0.306398	0.291532	0.304733	0.379436	0.360864	0.373673
M 96	Gorilla gorilla gorilla	0.797529	0.973454	0.90217	0.741249	0.933359	0.855155	0.968807	0.765246	0.846587	1.08055	0.820105	0.887295	0.285066	0.262023	0.261851	0.26853	0.251294	0.282083	0.237538	0.263447	0.238045	0.215191	0.246906	0.247446	0.370997	0.352433	0.35803	0.42176	0.420936	0.427963
M 135	Gorilla gorilla gorilla	0.715606	0.827833	0.827576	0.697447	0.811358	0.744352	0.99223	0.784783	0.829821	1.07422	0.861358	0.955052	0.405187	0.42319	0.378528	0.359579	0.371143	0.388398	0.33233	0.414375	0.341687	0.262541	0.339912	0.318808	0.391952	0.383687	0.345094	0.4001	0.461573	0.430843
M 264	Gorilla gorilla gorilla	0.721931	0.84631	0.817644	0.708855	0.822696	0.726808	1.00737	0.823831	0.879186	1.0707	0.885409	1.01168	0.377807	0.357768	0.343841	0.340026	0.330107	0.364195	0.256959	0.319982	0.275316	0.214226	0.276874	0.243438	0.377427	0.360011	0.35581	0.358363	0.439017	0.415129
M 300	Gorilla gorilla gorilla	0.762295	0.868093	0.796913	0.761627	0.84667	0.754138	1.00207	0.827712	0.926221	1.02181	0.880899	0.979536	0.309761	0.324239	0.328621	0.291165	0.300199	0.346482	0.25517	0.311195	0.284619	0.243947	0.28954	0.293294	0.322074	0.333316	0.319767	0.38844	0.416006	0.396192
M 372	Gorilla gorilla gorilla	0.764238	0.845409	0.881781	0.689731	0.806785	0.759064	0.939017	0.824081	0.758606	1.06113	0.859191	0.929813	0.369476	0.358777	0.375462	0.388709	0.380297	0.3876	0.277182	0.316346	0.345743	0.254041	0.321916	0.282529	0.396985	0.396871	0.349513	0.413911	0.438569	0.440453
M 729	Gorilla gorilla gorilla	0.745562	0.825455	0.820933	0.680932	0.823817	0.735133	0.971819	0.801935	0.872784	1.13908	0.887025	1.01961	0.36945	0.409518	0.345343	0.329496	0.326836	0.340689	0.289613	0.383614	0.292947	0.224577	0.278913	0.256617	0.322385	0.363497	0.335629	0.378078	0.388905	0.393321
M 798	Gorilla gorilla gorilla	0.960936	1.08071	1.02174	0.934968	1.00742	0.938049	0.752493	0.652185	0.696864	0.794355	0.732133	0.769397	0.28816	0.273132	0.28186	0.2752	0.260507	0.296646	0.275675	0.304548	0.289647	0.255226	0.263318	0.275611	0.271035	0.314561	0.310194	0.336042	0.369753	0.378191
M 856	Gorilla gorilla gorilla	0.808954	0.967746	0.944447	0.723313	0.900959	0.833853	0.927905	0.708786	0.756432	1.10815	0.818003	0.897418	0.308259	0.324542	0.302388	0.274373	0.291926	0.301835	0.2702	0.360582	0.299528	0.193002	0.284755	0.260172	0.347818	0.323211	0.291636	0.327137	0.344352	0.351221
FC 123	Gorilla gorilla gorilla	0.71648	0.779444	0.779938	0.643211	0.72737	0.648098	1.06418	0.928329	0.95122	1.21017	1.00556	1.14807	0.331535	0.354638	0.330933	0.344529	0.36926	0.394905	0.231288	0.302303	0.242755	0.223185	0.289057	0.258225	0.40508	0.405823	0.408609	0.452343	0.467288	0.43724
